# Supplementary material for: Improved Production and Biophysical Analysis of Recombinant Silicatein-α
Source: MDPI journal article supplement (doi:10.3390/biom10091209), 2020-08-20
Supplement: s1 [file s1]

# Improved Production and Biophysical Analysis of Recombinant Silicatein- $\alpha$

Emily I. Sparkes <sup>1,2</sup>, Rachel A. Kettles <sup>1,2</sup>, Chisom S. Egedeuzu <sup>1,2</sup>, Natalie L. Stephenson <sup>1,2</sup>,  
Stephanie A. Caslin <sup>1,2</sup>, S. Yasin Tabatabaei Dakhili <sup>1,2</sup>, Lu Shin Wong <sup>1,2,\*</sup>

<sup>1</sup> Manchester Institute of Biotechnology, University of Manchester, 131 Princess Street, Manchester M1 7DN, United Kingdom.

<sup>2</sup> Department of Chemistry, University of Manchester, Oxford Road, Manchester M13 9PL, United Kingdom.

\* Correspondence: l.s.wong@manchester.ac.uk

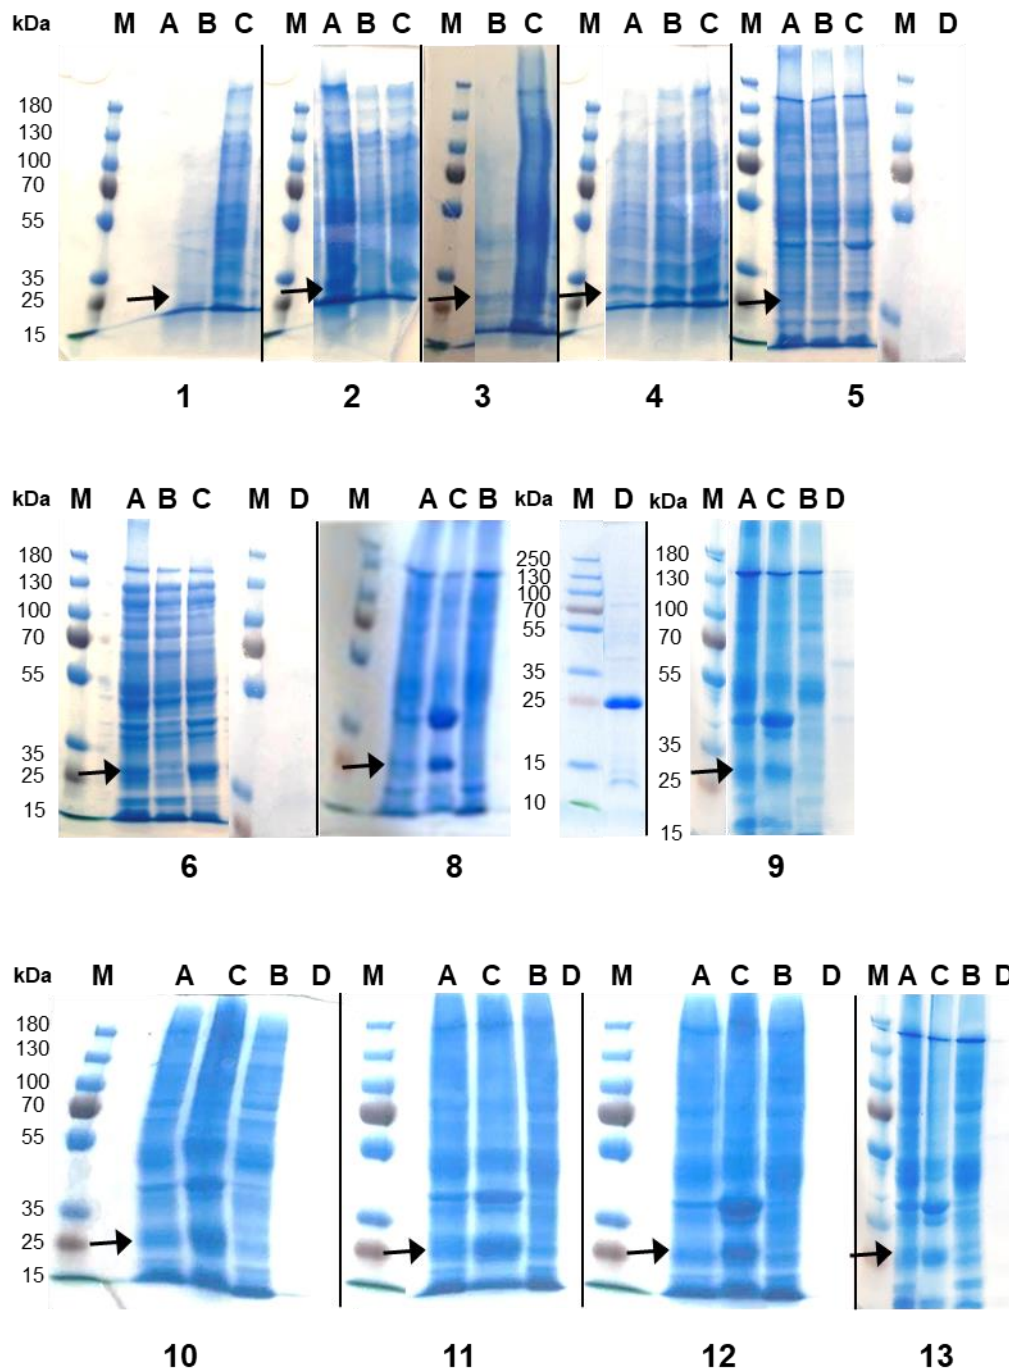

**Figure S1.** Images of SDS-PAGE gels demonstrating solubility analysis for His<sub>6</sub>-Sil $\alpha$  following lysis in various buffer mixtures (numbers below each image correspond to the buffers entries in Table 1). Lanes are labelled as follows: M = marker, A = total lysed protein, B = soluble lysis fraction, C = insoluble lysis fraction, D = post-IMAC fraction. Black arrows indicate presence of protein band of the desired size.

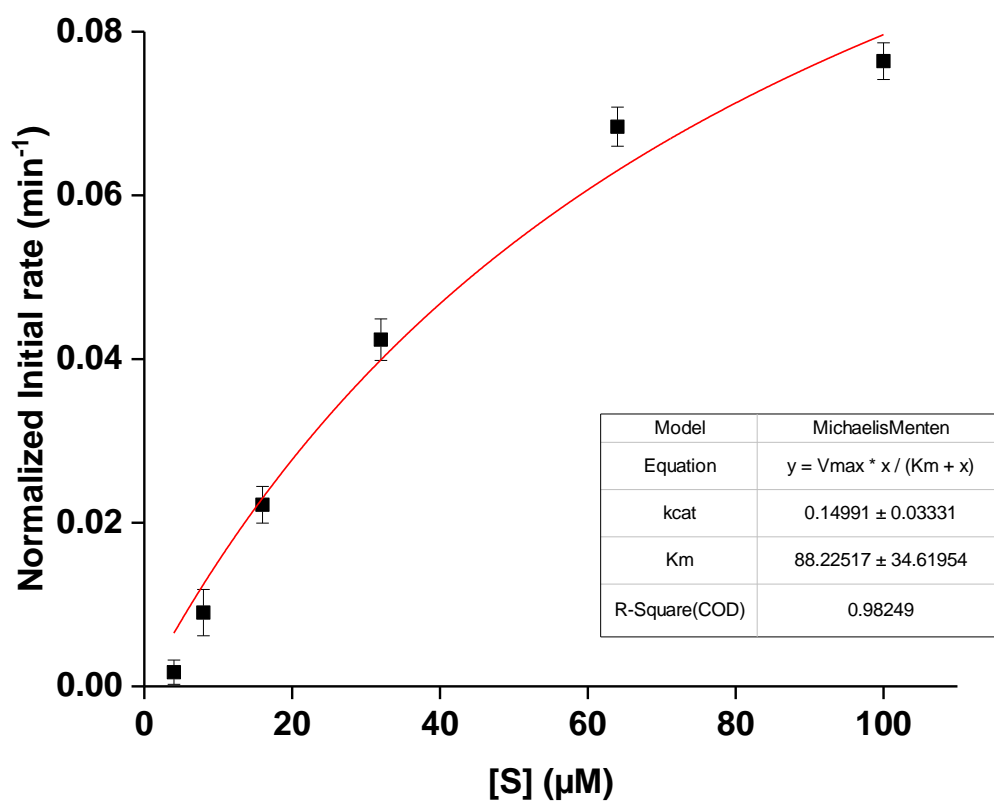

**Figure S2.** Michaelis-Menten plot of reaction velocity against TBDMS-ONp substrate concentration and best fit line. The error bars represent the standard deviations. The extracted parameters from the best-fit curve are shown in the inset, with standard deviations where appropriate.
